# Supplementary material
Source: Royal Society of Chemistry journal article supplement (doi:10.1039/d6tc00553e)
Supplement: d6tc00553e1.pdf [file d6tc00553e1.pdf]

## Mn-Sn Co-Doped NiO Nanostructures with Boosted Activity for Integrated Energy Conversion and Storage

Aman Kumar\*, Vijay Kumar, M.A. Shah

Department of Physics, National Institute of Technology, Srinagar, Jammu & Kashmir, Bharat (190006), INDIA

\*Corresponding Author: [chitoriaaman@gmail.com](mailto:chitoriaaman@gmail.com)

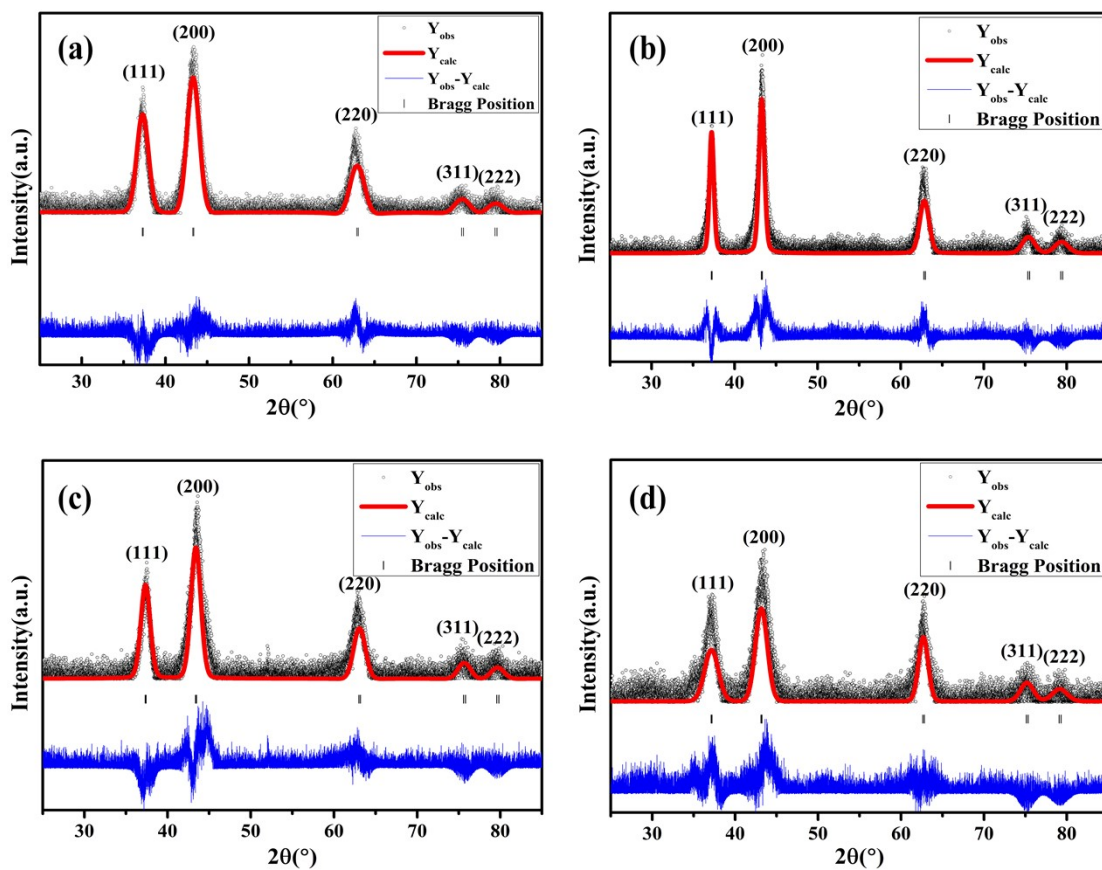

Figure S1: Rietveld refinement of XRD patterns for (a) Pristine, (b) NMS 2, (c) NMS 5, and (d) NMS 7.

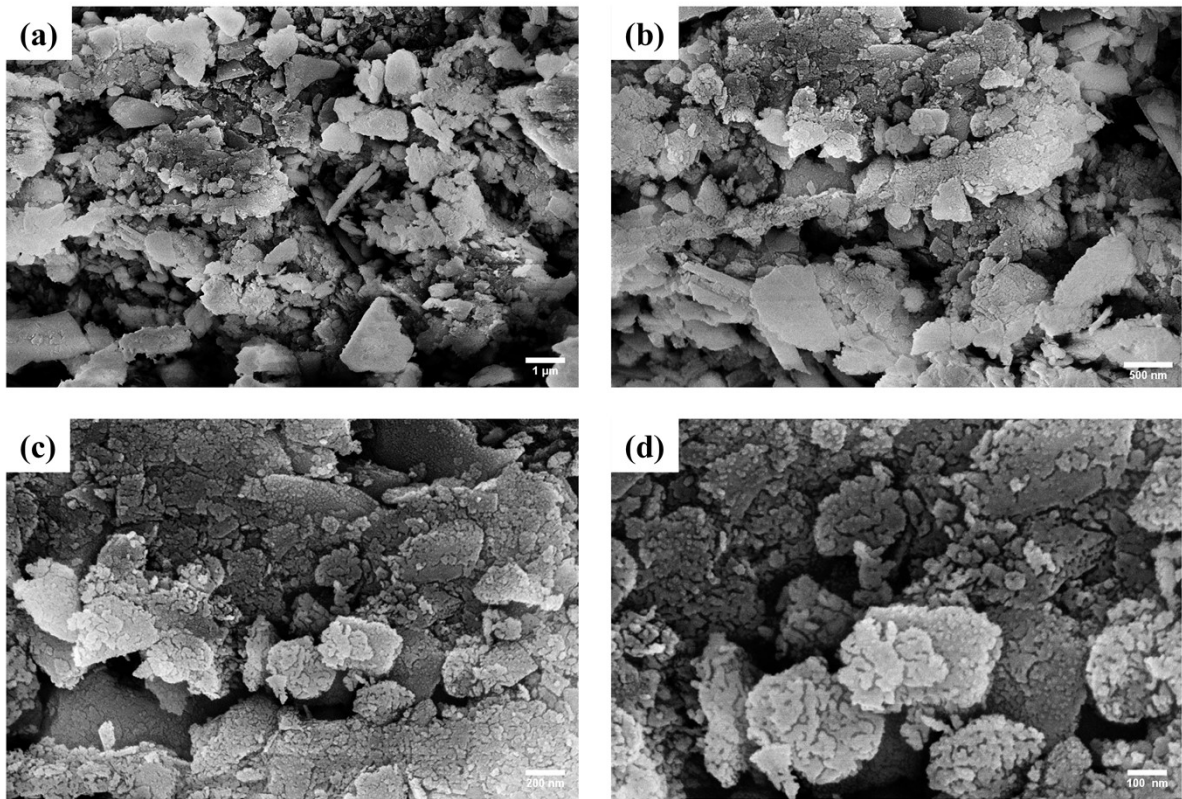

**Figure S2:** FESEM micrographs of sample NMS 5 at different resolutions showing its highly porous morphology.

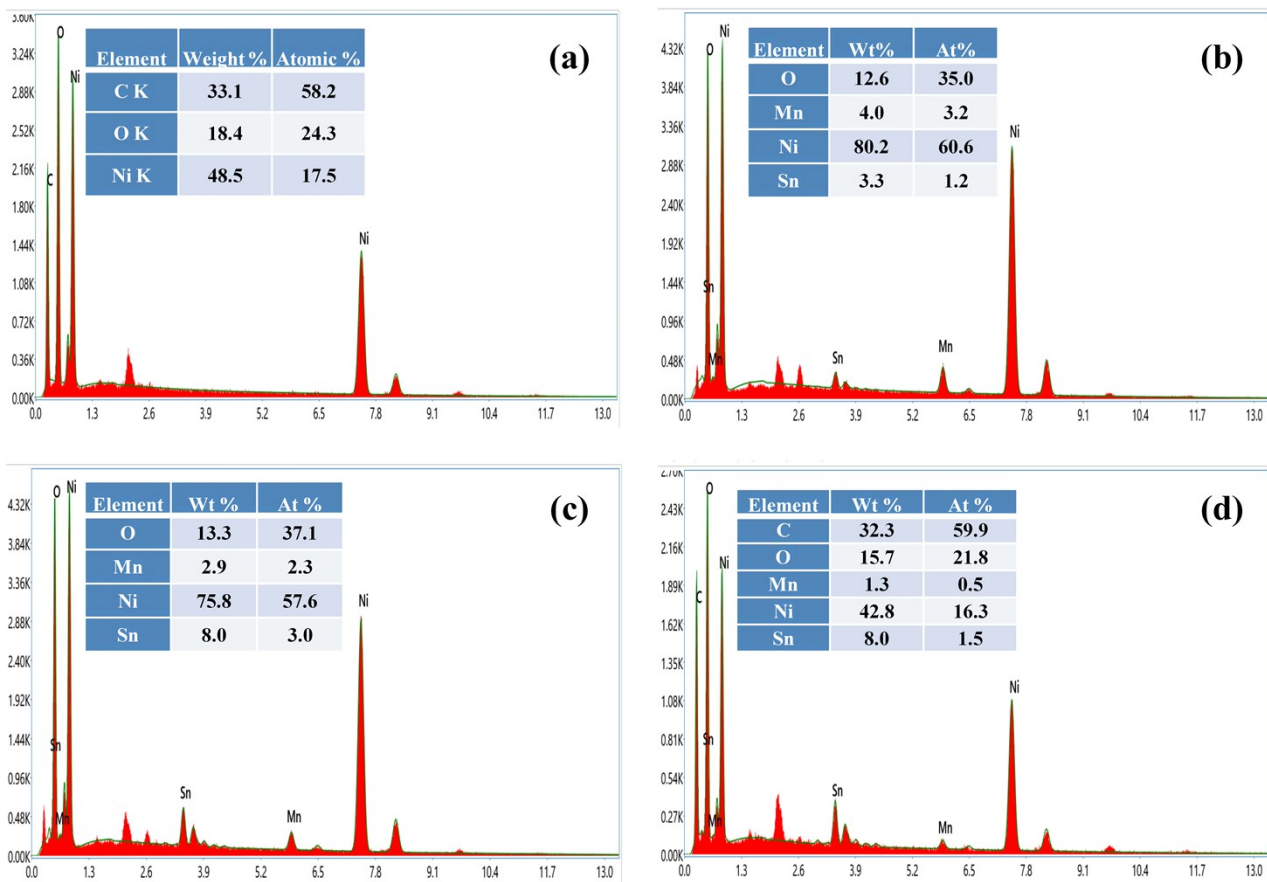

Figure S3: EDX spectra of (a) Pristine, (b) NMS 2, (c) NMS 5, and (d) NMS 7.

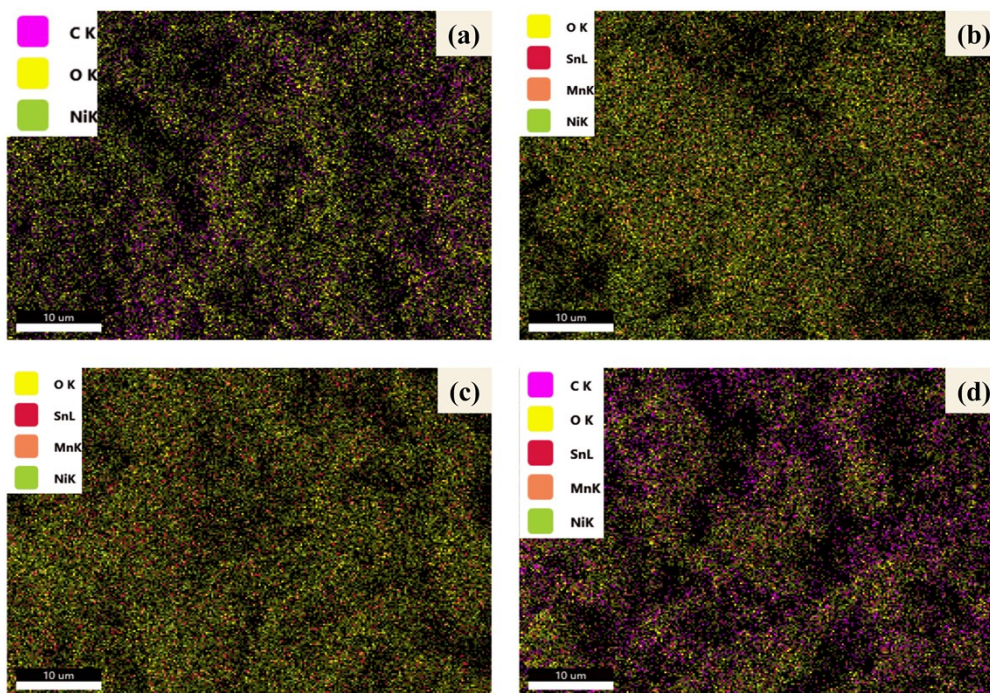

Figure S4: Elemental mapping of (a) Pristine, (b) NMS 2, (c) NMS 5, and (d) NMS 7.

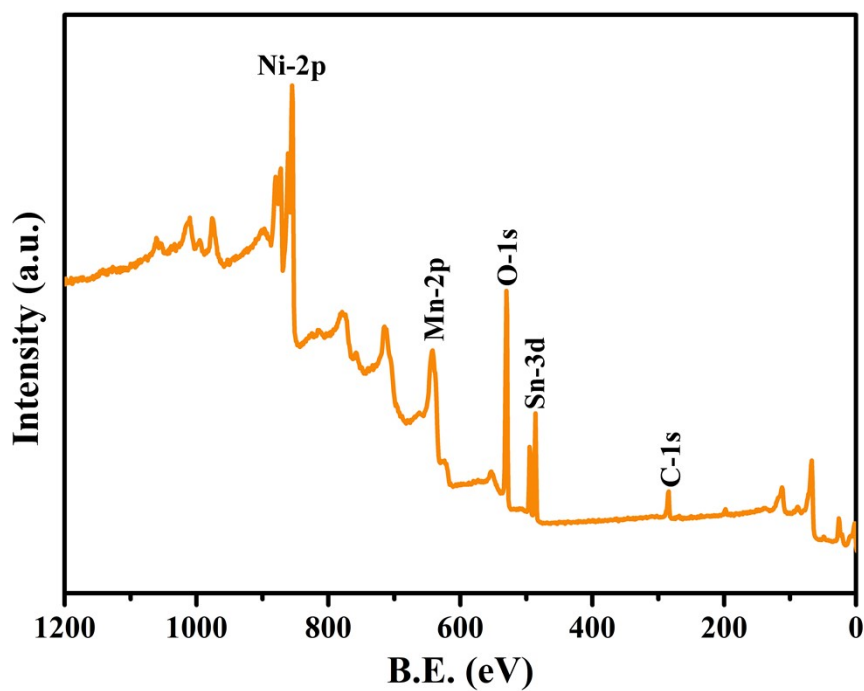

Figure S5: X-ray photoelectron spectroscopy survey spectrum.

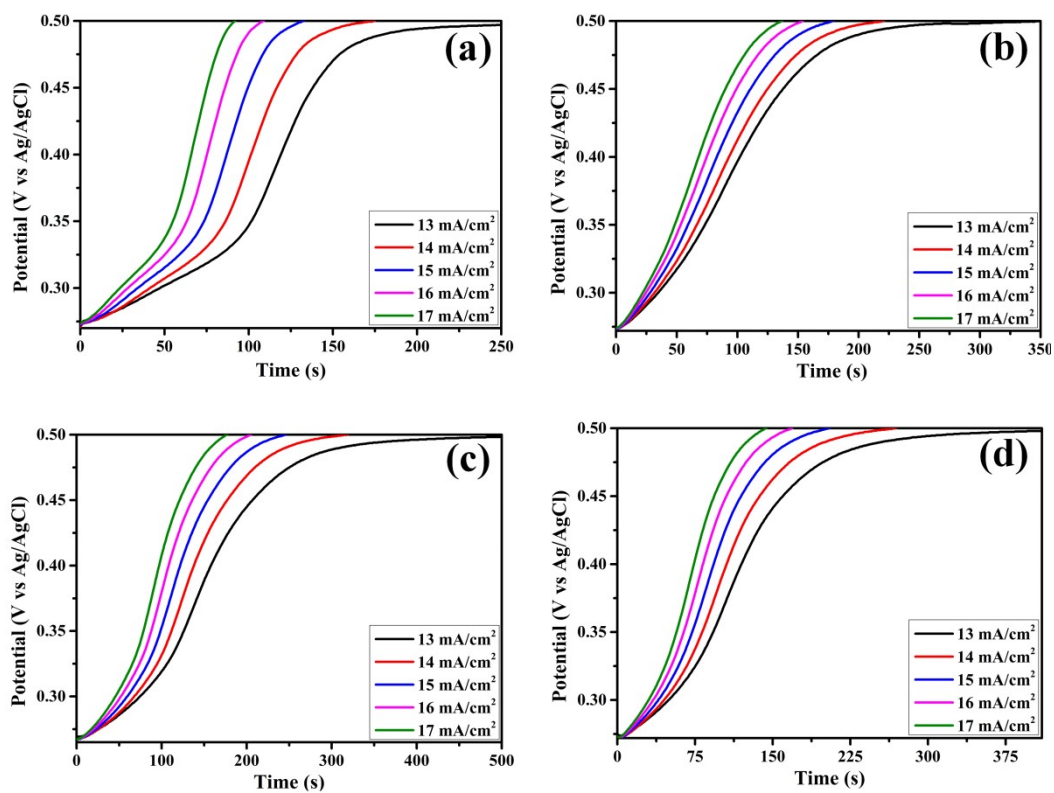

Figure S6: Galvanostatic charging profiles of (a) pristine, (b) NMS 2, (c) NMS 5, and (d) NMS 7, respectively.
